# Supplementary material
Source: PubMed Central journal article supplement (PMC4340604)

**Figure appendix 1: Probability of death from birth to exact age 15 years (15q0) by country and sex for major causes in 2013**

An interactive version of this figure is available at <http://vizhub.healthdata.org/le>. The set of causes is mutually exclusive and collectively exhaustive.

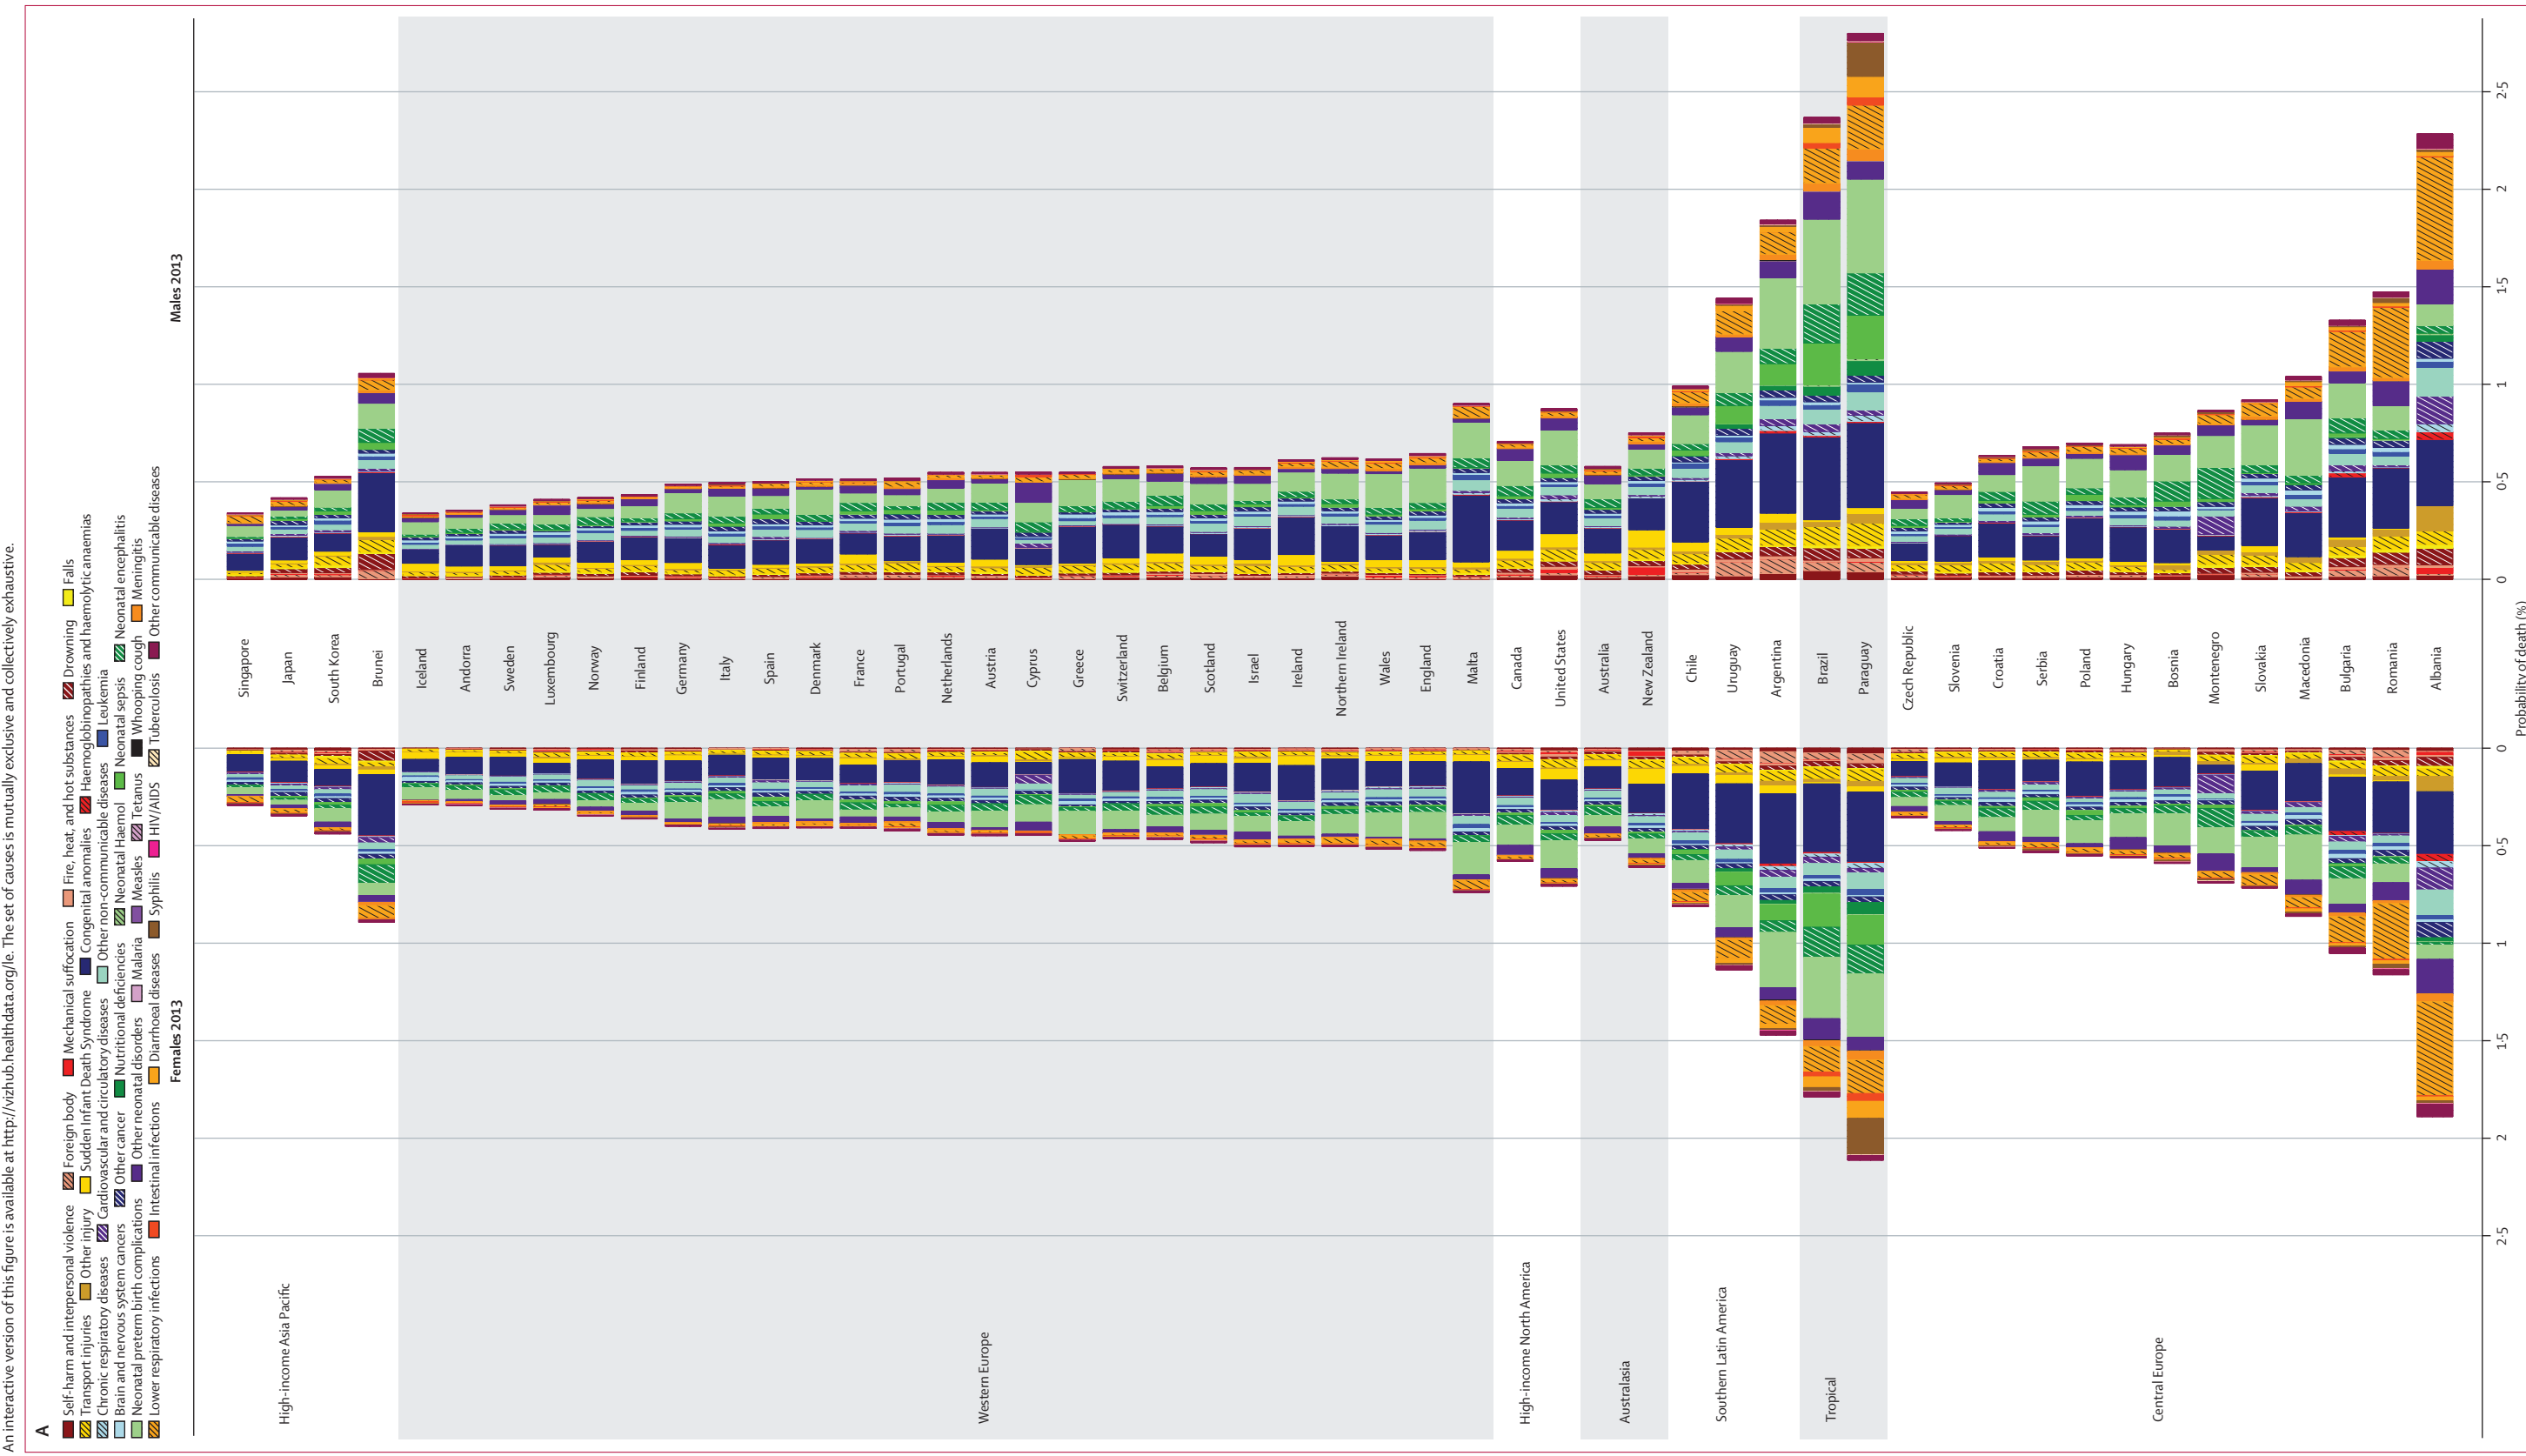

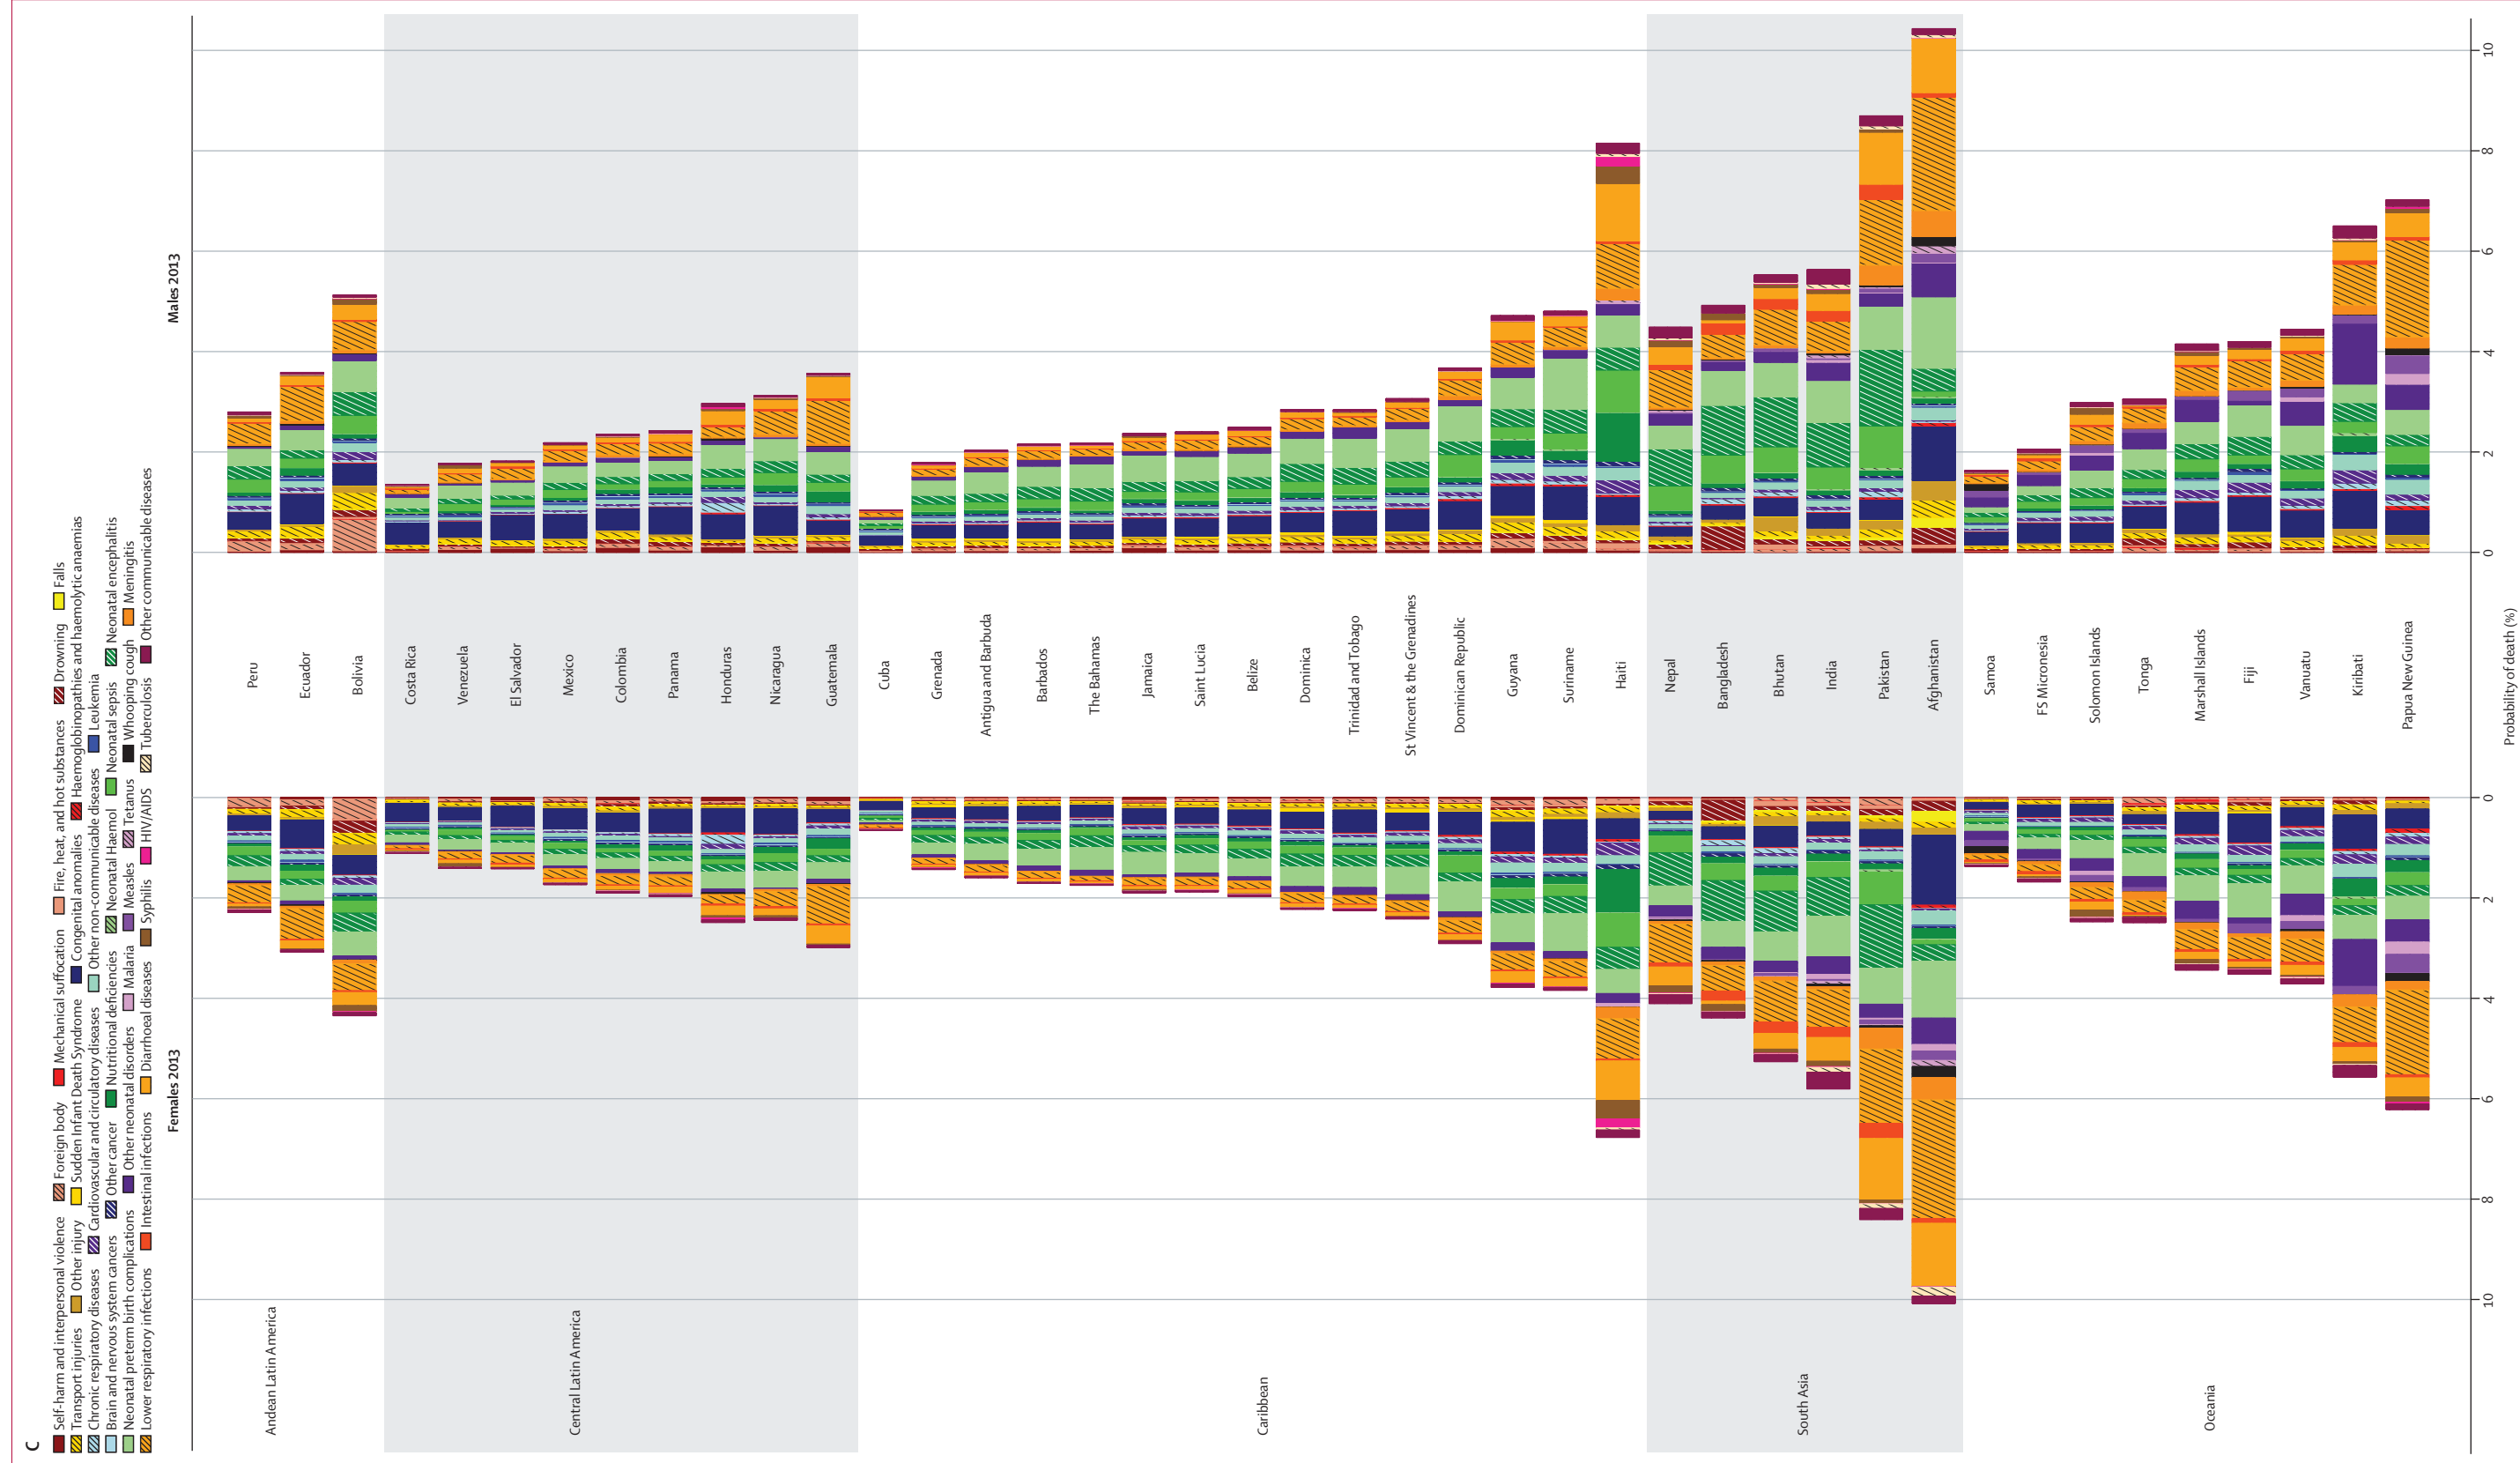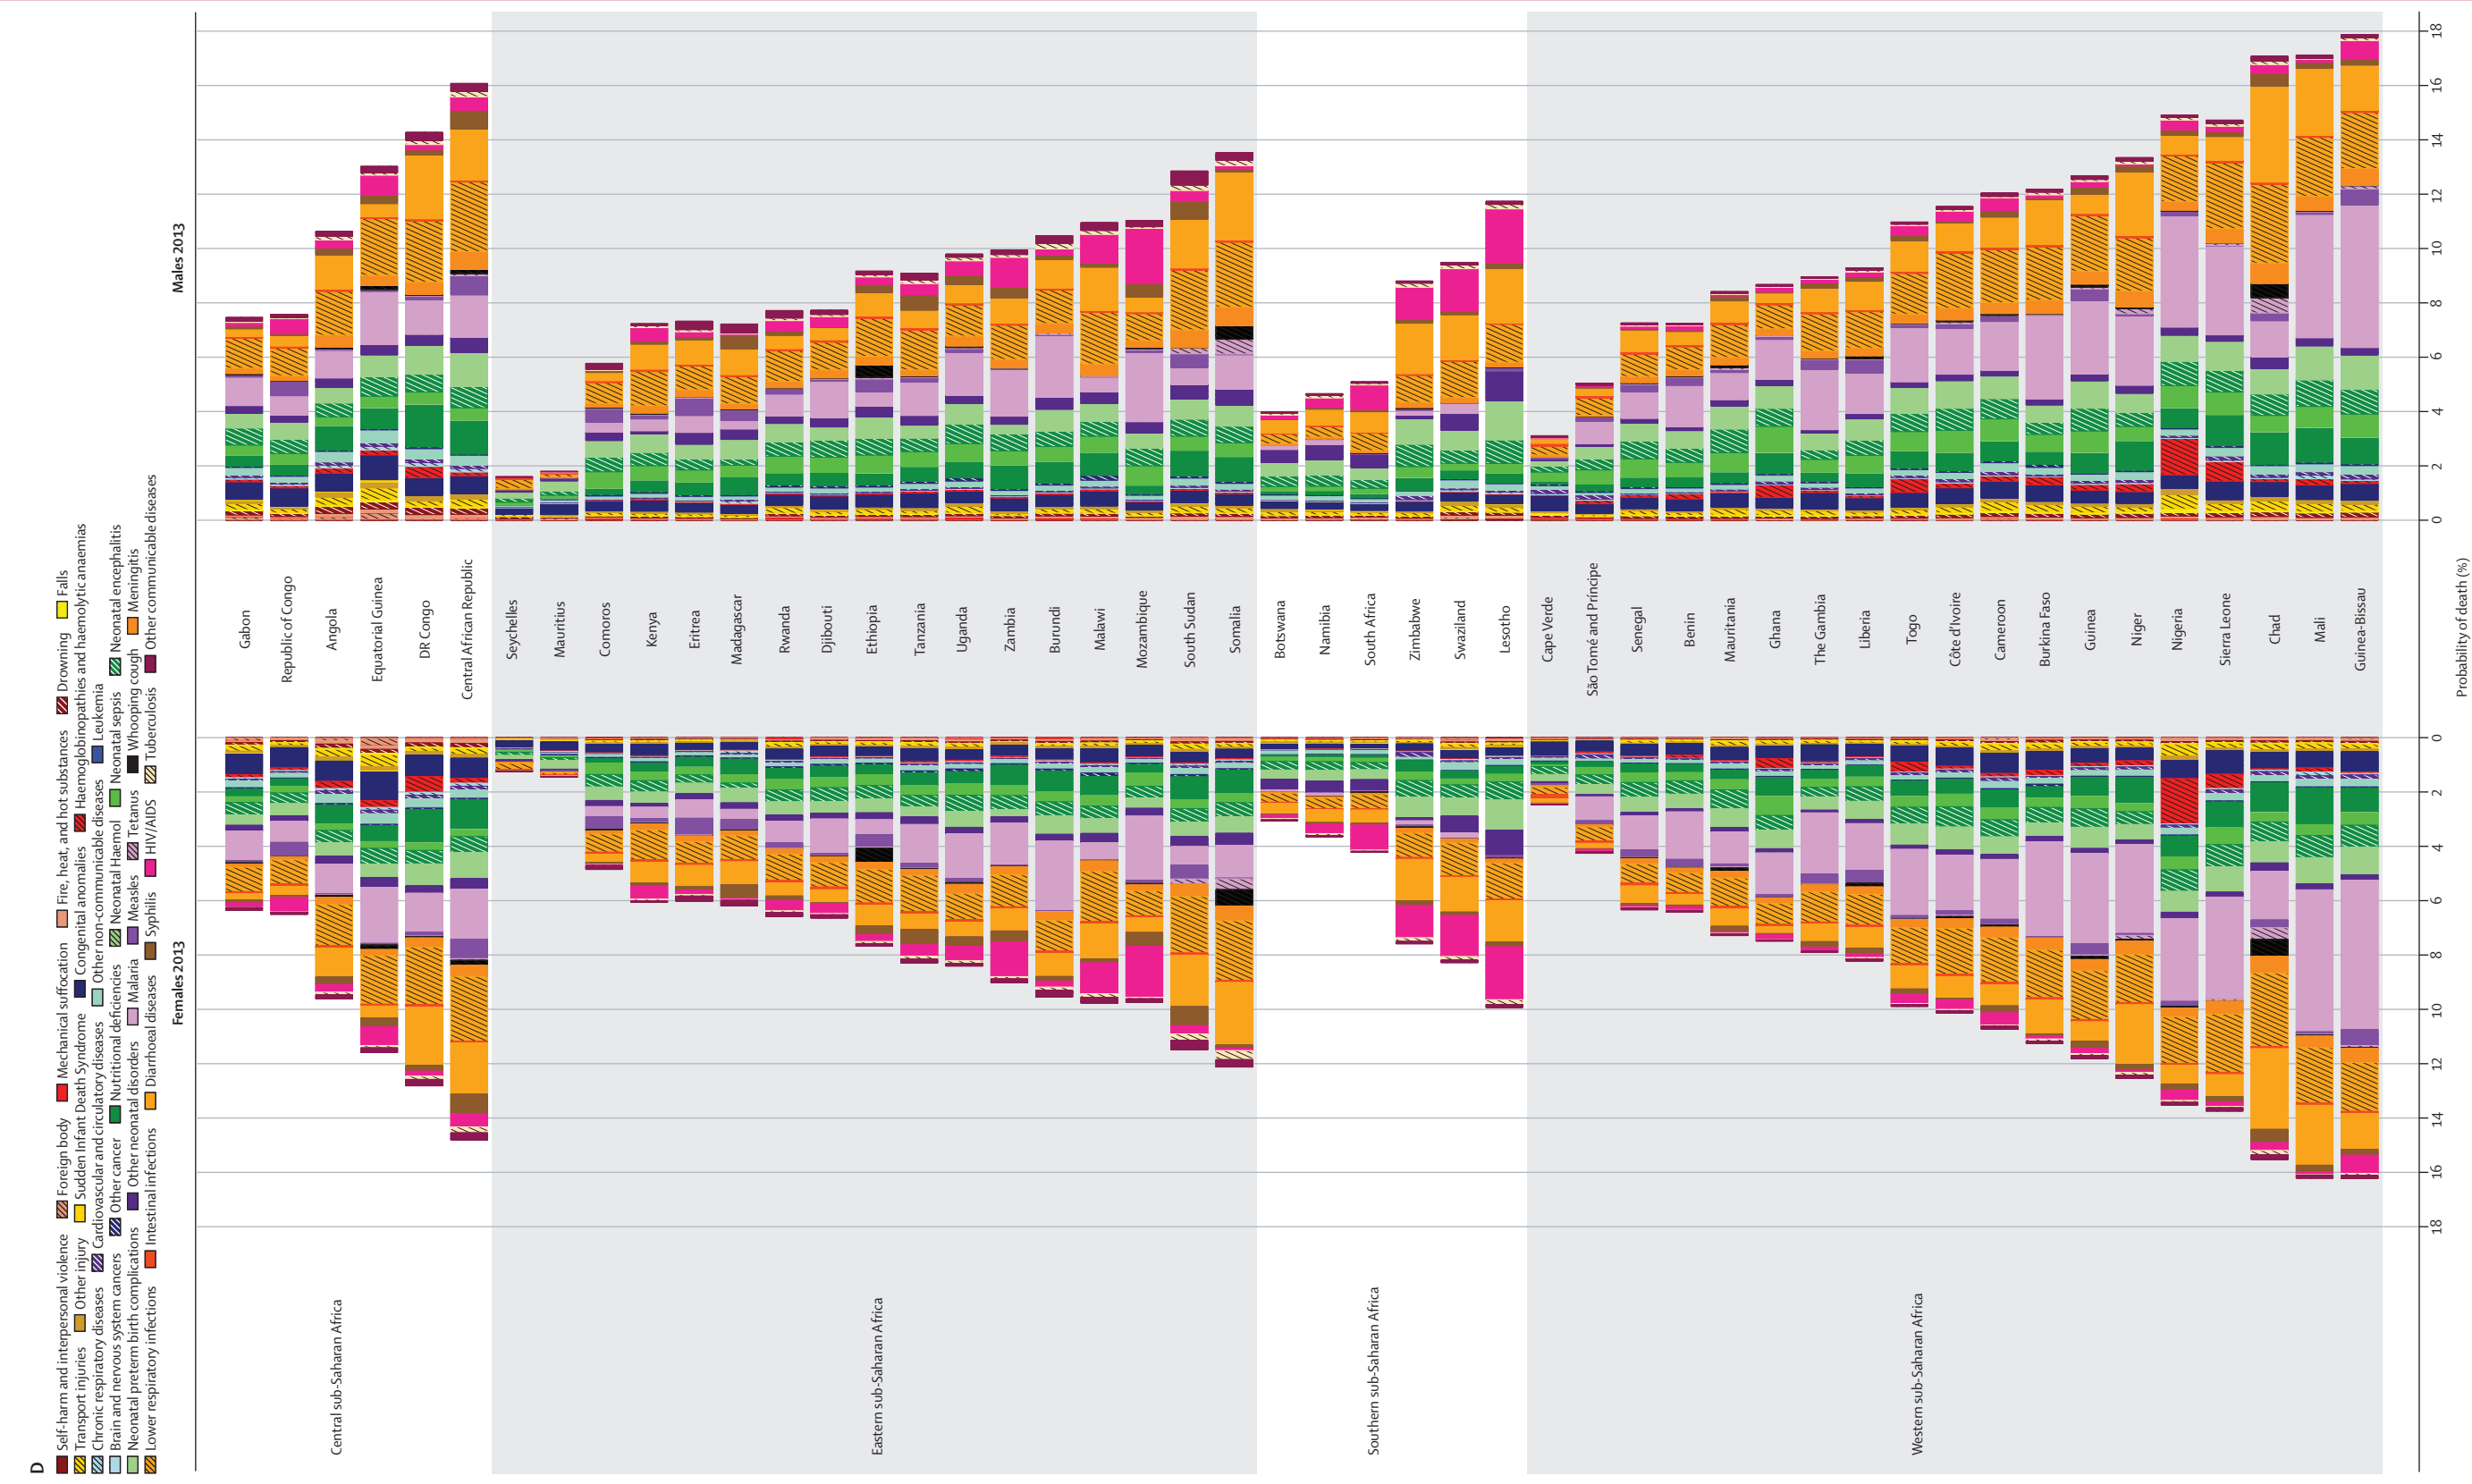

Supplement: NIHMS61919-supplement-Supplementary_pulloutfig_appendix1.pdf [file NIHMS61919-supplement-Supplementary_pulloutfig_appendix1.pdf]
