# Supplementary material
Source: PubMed Central journal article supplement (PMC4340604)

**Figure appendix 2: Probability of death from exact age 50 years to exact age 75 years (25-50) by country and sex for major causes in 2013**  
 An interactive version of this figure is available at <http://vizhub.healthdata.org/le>. The set of causes is mutually exclusive and collectively exhaustive. NN=Haemo-haemolytic disease in neonates and other neonatal jaundice. NCD=non-communicable disease. CVD=cardiovascular disease. CKD=chronic kidney disease.

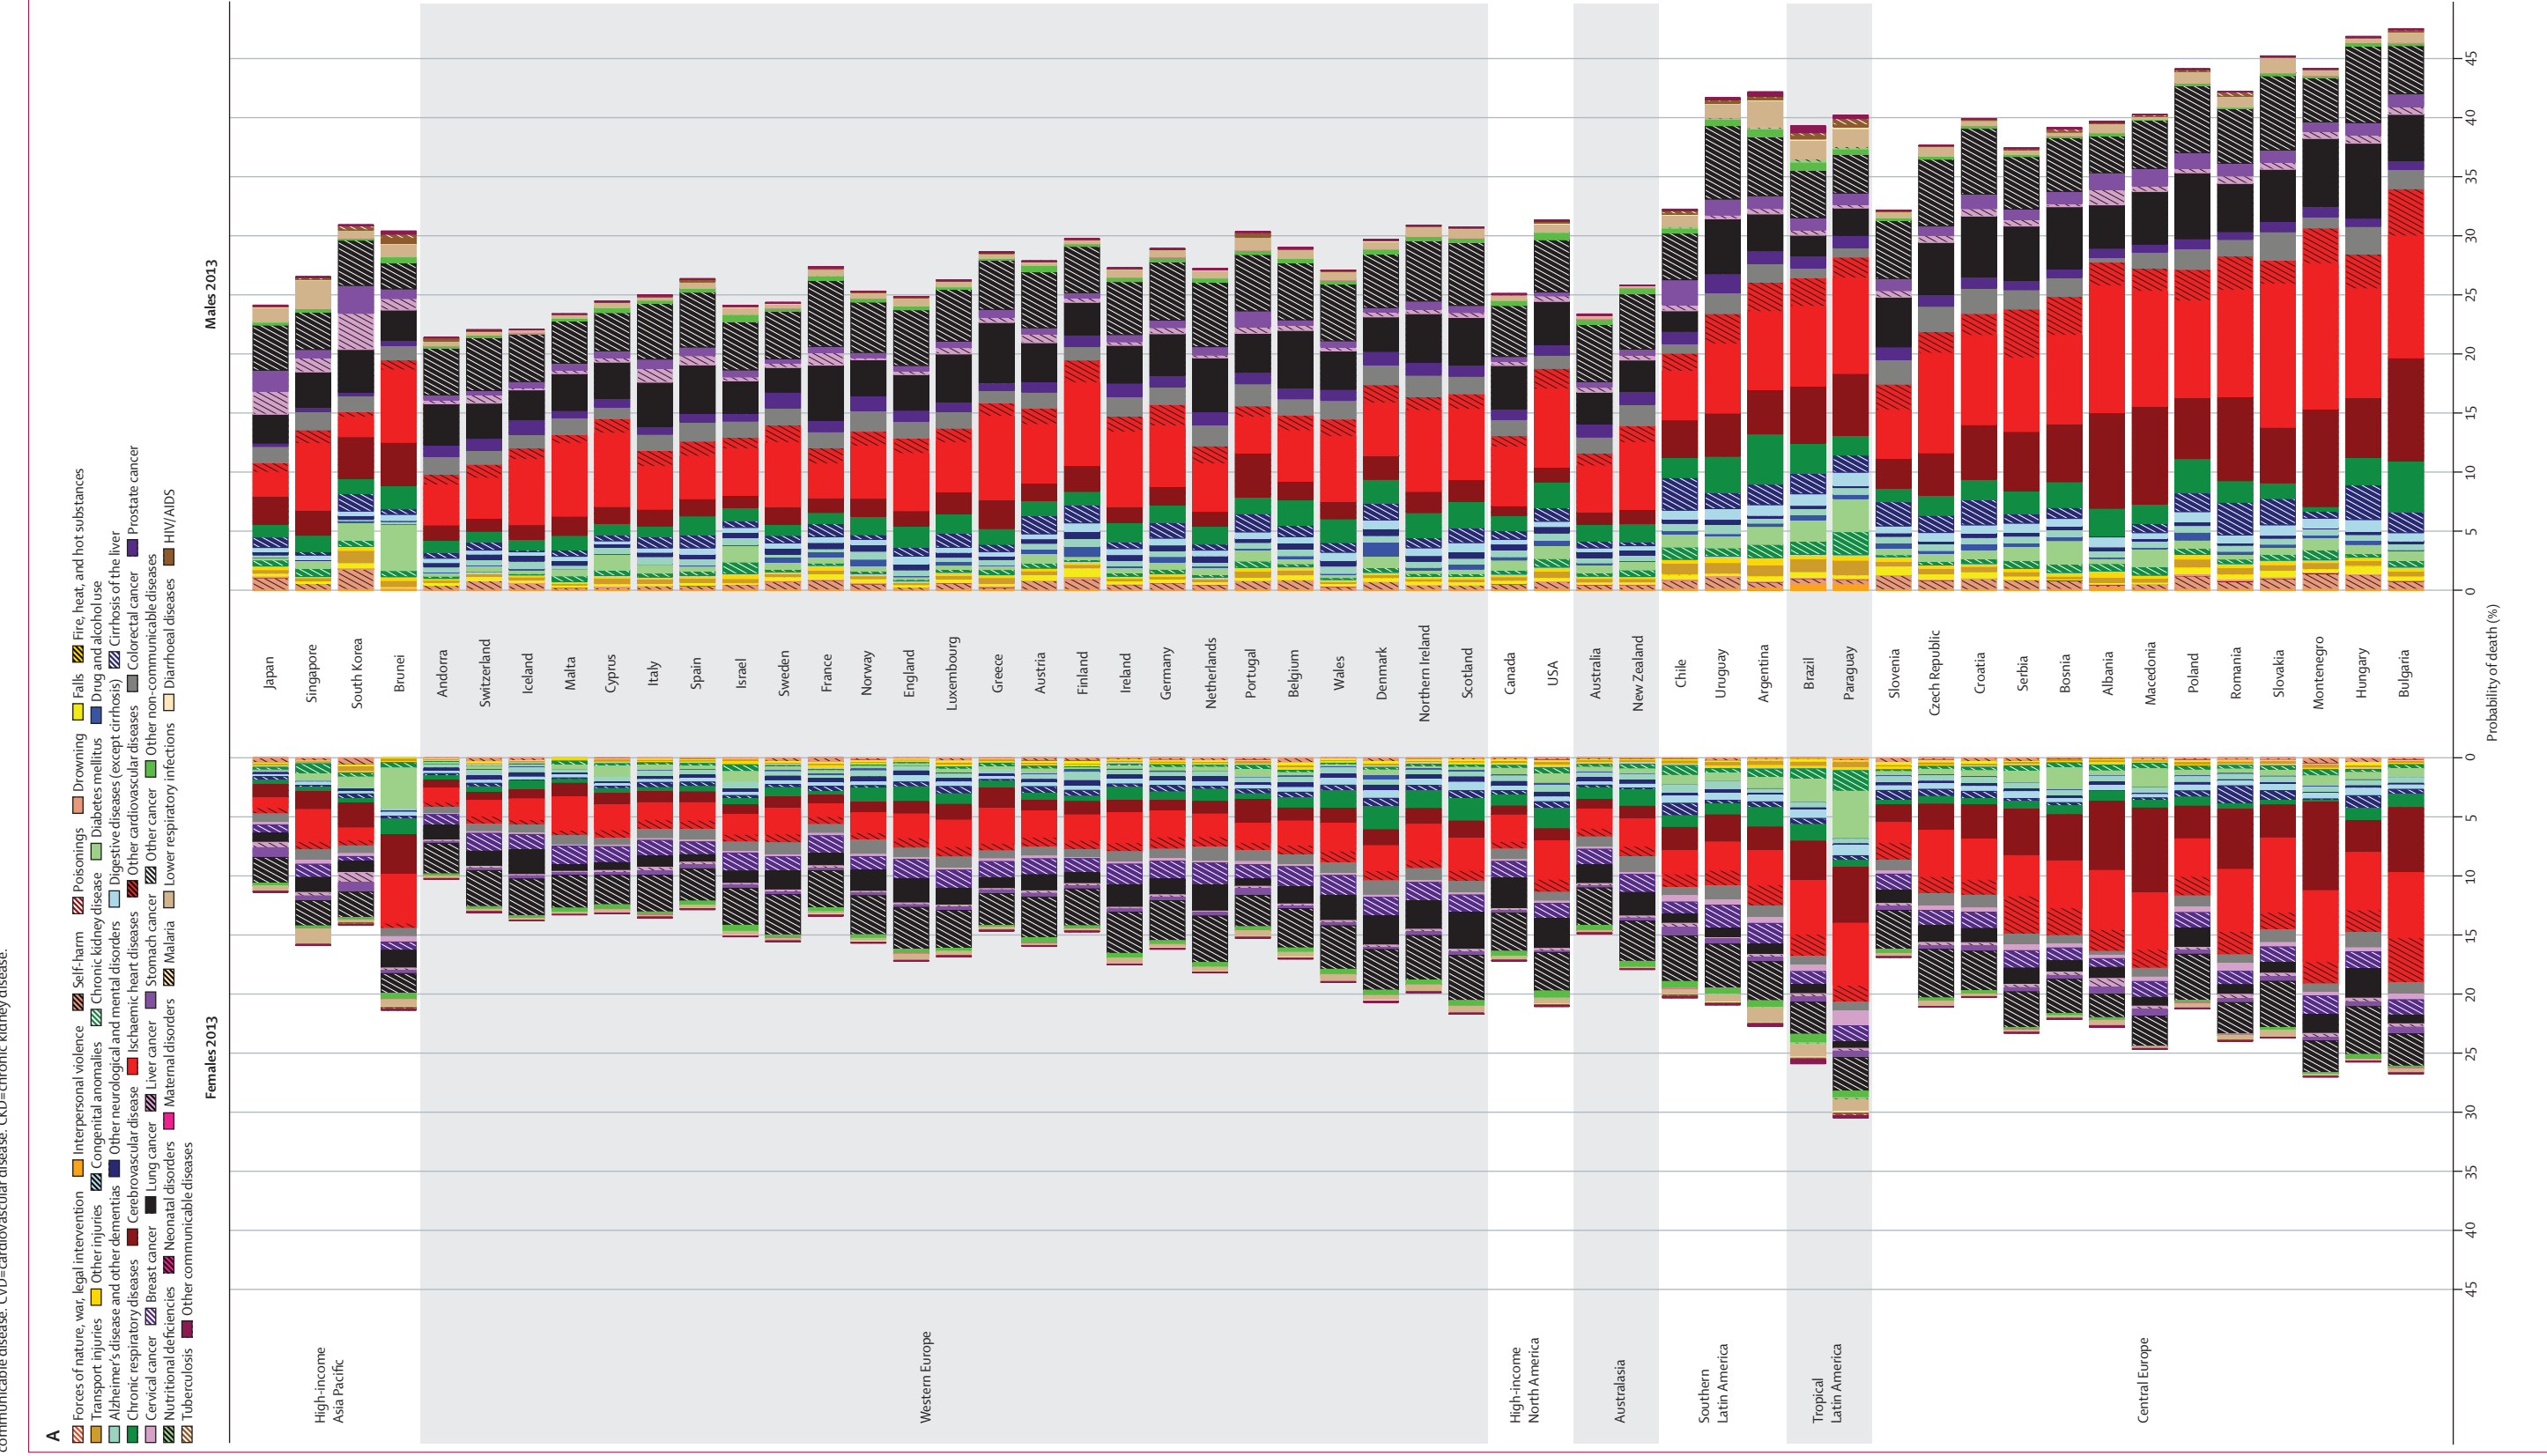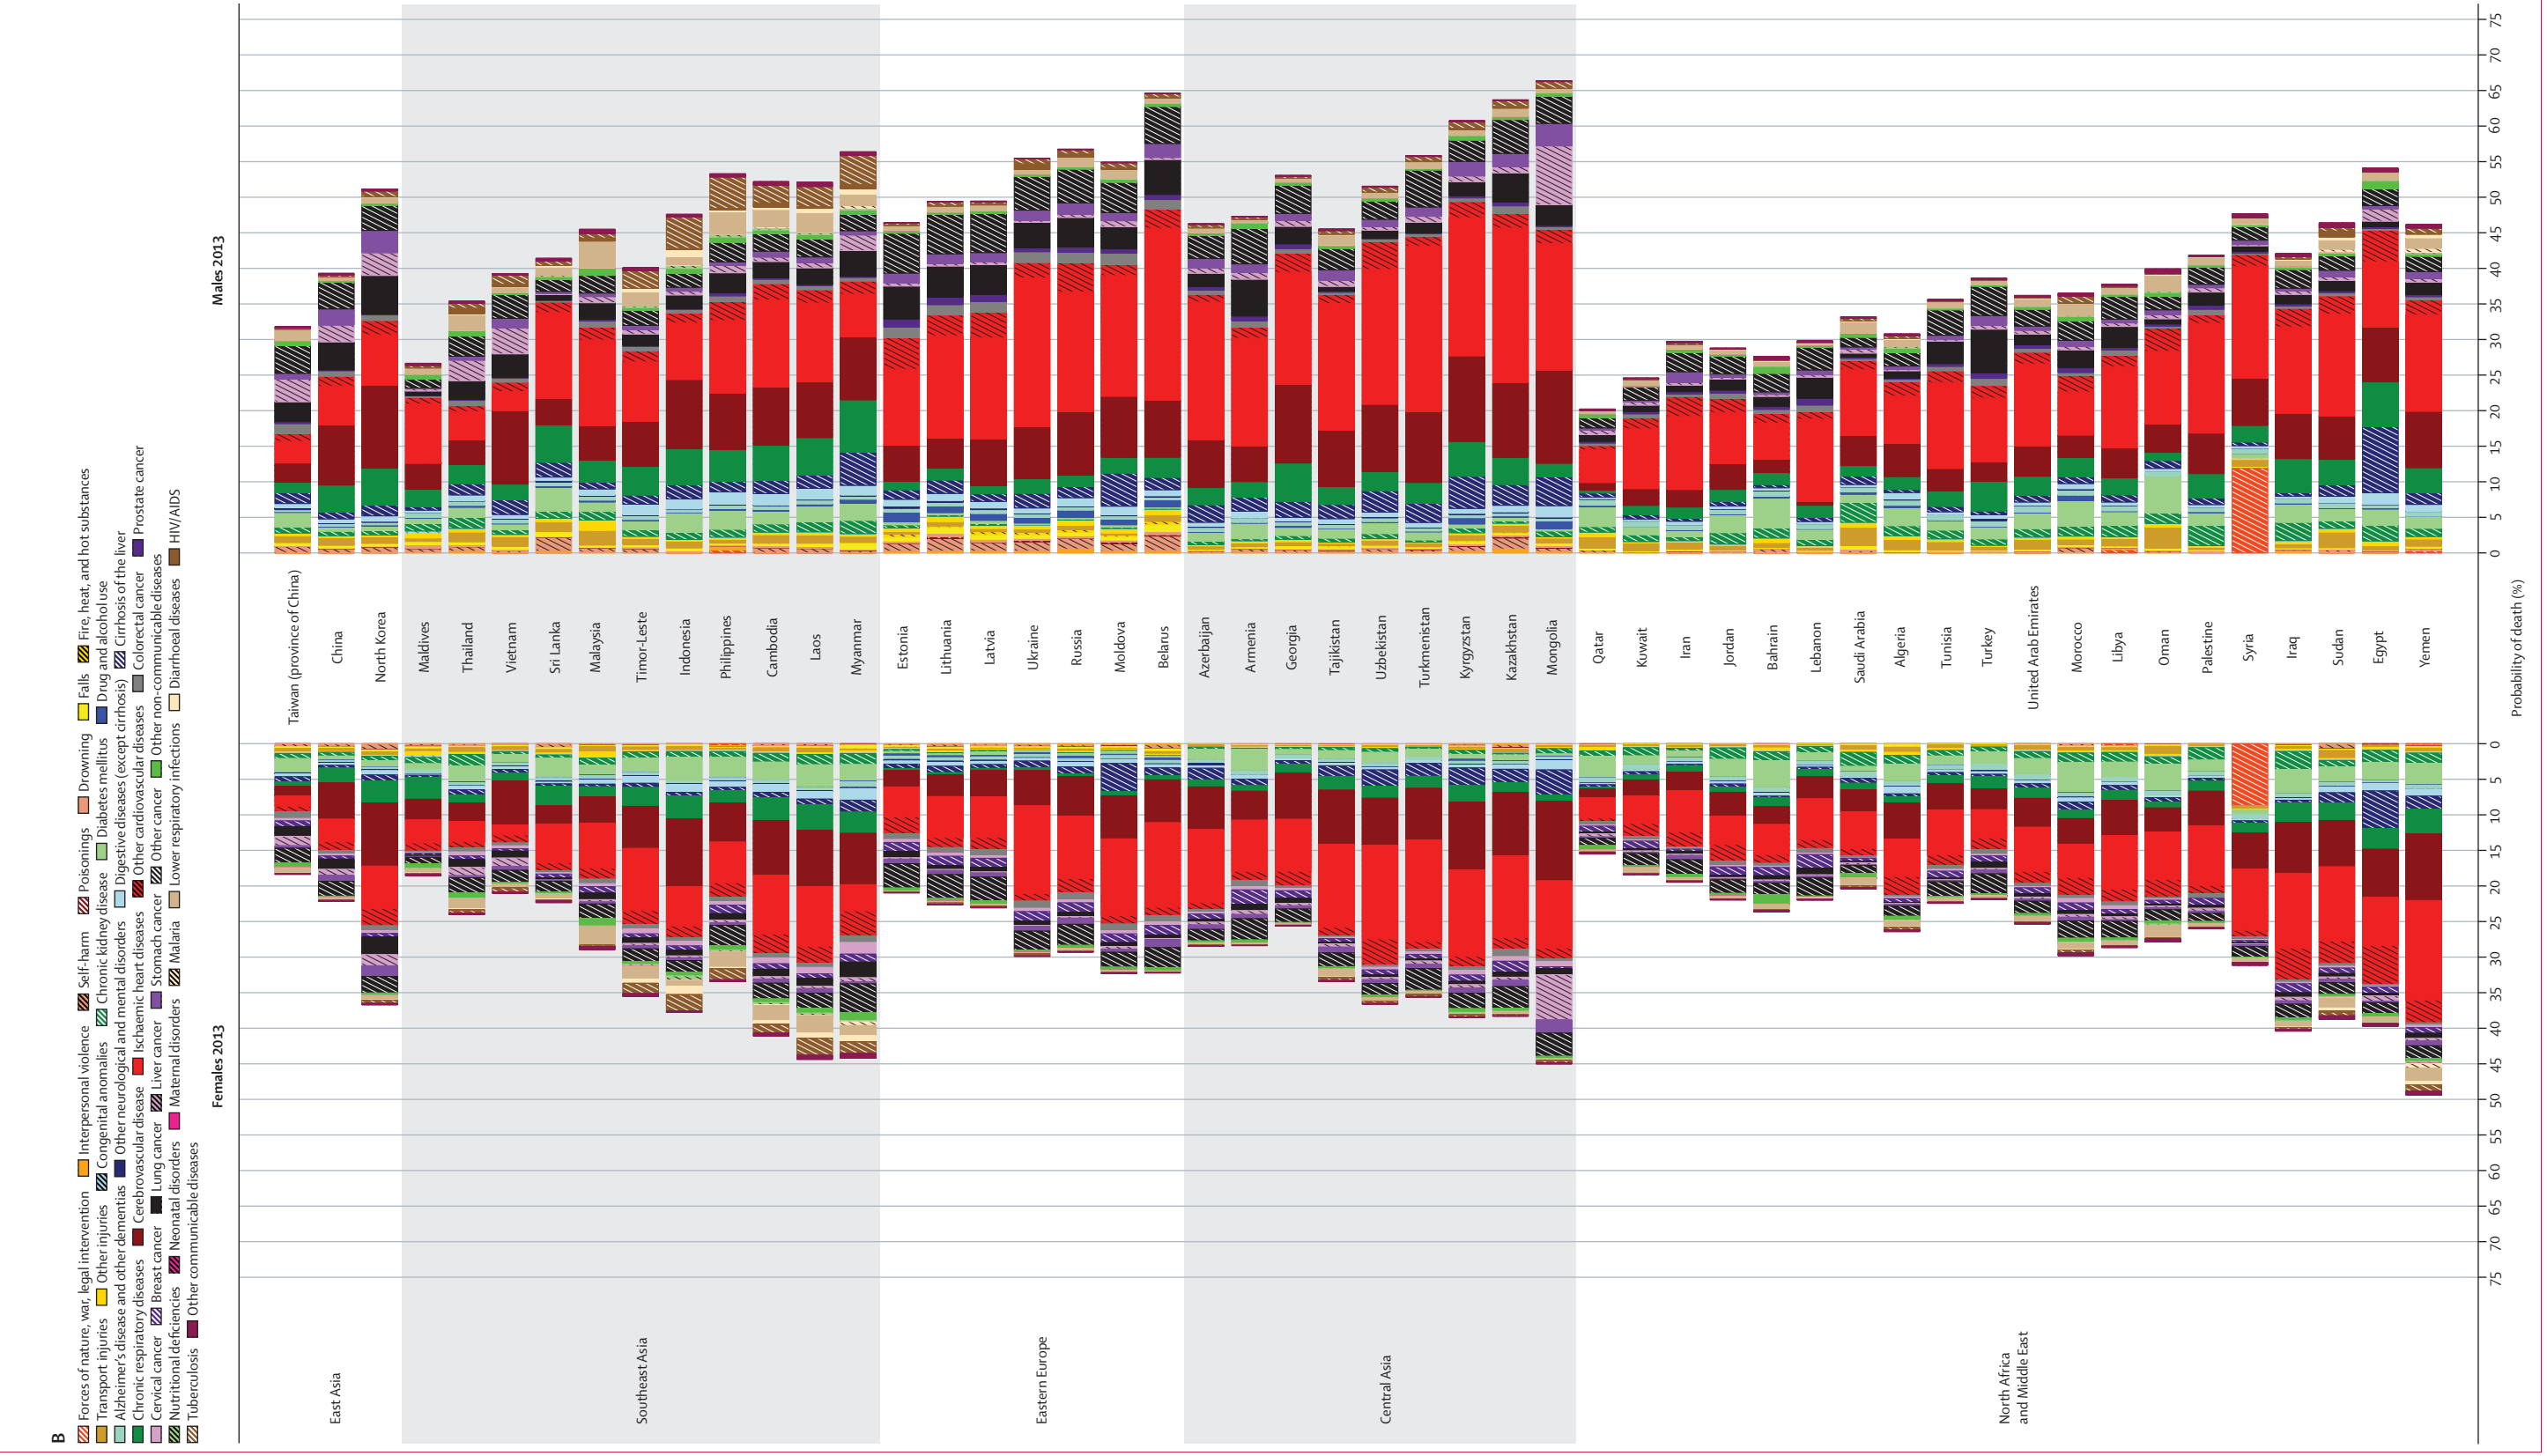

Supplement: NIHMS61919-supplement-Supplementary_pulloutfig_appendix3.pdf [file NIHMS61919-supplement-Supplementary_pulloutfig_appendix3.pdf]
